# Supplementary material for: The difference between shorter- versus longer-term psychotherapy for adult mental health disorders: a systematic review with meta-analysis
Source: Springer Nature journal article supplement (doi:10.1186/s12888-023-04895-6), 2023-06-16
Supplement: MOESM5 [file 25502432]

**Supplementary material 5. Risk of bias table**

| Study                         | Risk of bias |    |    |    |    |    |    | Overall |
|-------------------------------|--------------|----|----|----|----|----|----|---------|
|                               | D1           | D2 | D3 | D4 | D5 | D6 | D7 |         |
| Barkham et al. 1996           | -            | -  | -  | -  | -  | -  | +  | X       |
| Bohni et al. 2009             | -            | -  | -  | X  | X  | -  | +  | X       |
| Böttche et al. 2021           | +            | -  | -  | -  | X  | +  | +  | X       |
| Bruijniks et al. 2020         | +            | +  | -  | -  | X  | X  | +  | X       |
| Christensen et al. 2006       | -            | -  | -  | -  | -  | -  | +  | X       |
| Clark et al. 1999             | -            | -  | -  | -  | -  | -  | X  | X       |
| Dekker et al. 2004            | -            | -  | X  | +  | X  | -  | +  | X       |
| Dell et al. 2022              | +            | +  | X  | +  | +  | +  | +  | X       |
| Ehlers et al. 2014            | -            | -  | X  | +  | +  | -  | +  | X       |
| Foa et al. 2018               | -            | -  | -  | +  | X  | X  | +  | X       |
| Hadjistavropoulos et al. 2022 | +            | -  | X  | X  | X  | +  | +  | X       |
| Herbert et al. 2004           | -            | -  | X  | X  | X  | -  | +  | X       |
| Kenardy et al. 2003           | -            | -  | -  | -  | -  | X  | X  | X       |
| Knekt et al. 2008             | +            | +  | -  | X  | X  | -  | +  | X       |
| Lorentzen et al. 2013         | X            | -  | -  | -  | X  | X  | +  | X       |
| McMain et al. 2022            | +            | +  | X  | +  | X  | +  | +  | X       |
| Nacasch et al. 2015           | +            | +  | -  | +  | X  | -  | +  | X       |
| Roberge et al. 2008           | -            | -  | -  | -  | -  | -  | +  | X       |
| Shapiro et al. 1990           | -            | -  | -  | -  | X  | -  | +  | X       |

D1: Random sequence generation  
 D2: Allocation concealment  
 D3: Blinding of participants and personnel  
 D4: Blinding of outcome assessment  
 D5: Incomplete outcome data  
 D6: Selective reporting  
 D7: Other sources of bias

Judgement  
 High  
 Unclear  
 Low
