# Supplementary material for: The difference between shorter- versus longer-term psychotherapy for adult mental health disorders: a systematic review with meta-analysis
Source: Springer Nature journal article supplement (doi:10.1186/s12888-023-04895-6), 2023-06-16

Supplementary material 18. Fixed-effect meta-analysis of short-term versus long-term cognitive-behavioral therapy for anxiety disorders on anxiety symptoms (sensitivity analysis)

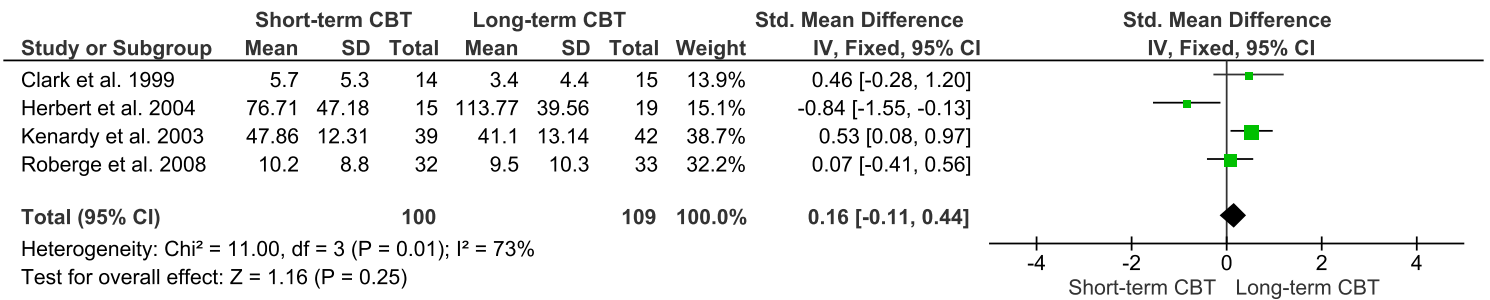

Supplement: MOESM18 [file 25502432]
