# Supplementary material for: The difference between shorter- versus longer-term psychotherapy for adult mental health disorders: a systematic review with meta-analysis
Source: Springer Nature journal article supplement (doi:10.1186/s12888-023-04895-6), 2023-06-16

Supplementary material 19. Fixed-effect meta-analysis of short-term versus long-term psychodynamic psychotherapy for mood- and anxiety disorders on level of functioning (sensitivity analysis)

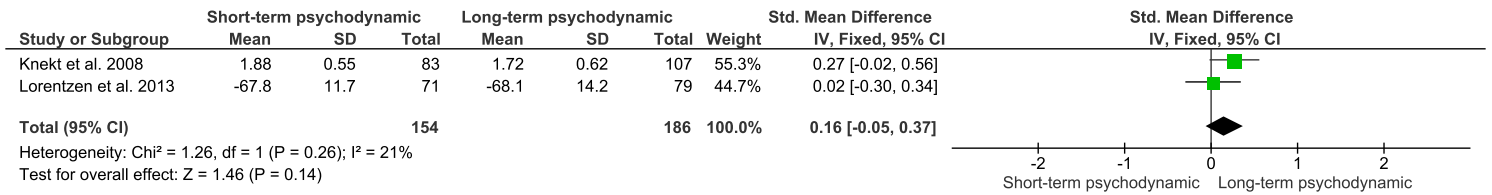

Supplement: MOESM19 [file 25502432]
